# Supplementary material for: Risk of sudden cardiac death in relation to season-specific cold spells: a case–crossover study in Finland
Source: PubMed Central journal article supplement — BMJ Open. 2017 Nov 10;7(11):e017398. doi: 10.1136/bmjopen-2017-017398 (PMC5695410; doi:10.1136/bmjopen-2017-017398), 2017-11-10
Supplement: bmjopen-2017-017398supp001.pdf [file bmjopen-2017-017398supp001.pdf]

**Table S1. Underlying cardiac disease of victims of non-ischaeemic SCD based on autopsy finding.**

| Underlying cardiac disease                 | n (%)      |
|--------------------------------------------|------------|
| Hypertensive cardiomyopathy                | 163 (19.1) |
| Valvular heart disease                     | 44 (5.1)   |
| Inflammatory heart disease                 | 34 (4.0)   |
| Dilated cardiomyopathy                     | 26 (3.0)   |
| Alcoholic cardiomyopathy                   | 170 (19.9) |
| Hypertrophic obstructive cardiomyopathy    | 3 (0.4)    |
| Hypertrophic cardiomyopathy                | 12 (1.4)   |
| Cardiomyopathy related to obesity          | 237 (27.7) |
| Arrhythmogenic right ventricular dysplasia | 6 (0.7)    |
| Fibrotic cardiomyopathy                    | 128 (15.0) |
| Primary arrhythmia                         | 10 (1.2)   |
| Anomalous coronary arteries                | 3 (0.4)    |
| Not classified                             | 19 (2.2)   |
